# Supplementary material
Source: publisher figshare collection journal article supplement (https://tandf.figshare.com/ndownloader/files/20206248)
Supplement: Supplementary file 1 [file 20206248]

**SUPPLEMENTAL ONLINE MATERIAL**

**Interview protocol**

1. What was the most interesting thing you learned in the academy? Why? Are there other things you learned you’d like to tell me about?
2. What was something you liked doing, and why?
3. What was something you didn’t enjoy so much during the academy?
4. What do you want to do as a career?
5. If you had to explain what science is to someone, what would you tell them?
6. Do you like doing science? Why or why not? (Prompt: Is there anything in particular you do/don’t like?)
7. Are you good at science? Do you feel differently about your science ability after being in the academy?
8. Think about someone who is a scientist. What are they like? (What kind of science do they do?) Are you like that person? Why or why not?
9. Tell me about the academy instructors. Did anything surprise you?
10. Tell me about a time during the camp when you felt supported by your instructor. What activity were you doing, and how did the instructor help you?
11. Was there a time during the academy that you felt like a scientist?

If yes, prompt: What made you feel like a scientist? (additional: what were you doing, talking to, tools using, clothes wearing, thinking about)?

1. Was there anything you learned about science from working with professional scientists?
2. We’re curious about how you think about the science you did at Bright Girls compared to what you do at school. How was doing science in Bright Girls different than doing science at school? How was it the same as doing science at school?
3. Did the academy change your ideas about science? If so, how?
4. Is there anything else you’d like to tell me or share with me about your experience?
